# Supplementary material for: Virtual Patients and Sensitivity Analysis of the Guyton Model of Blood Pressure Regulation: Towards Individualized Models of Whole-Body Physiology
Source: PLOS journal article supplement (doi:10.1371/journal.pcbi.1002571), 2012-06-28
Supplement: S3 (10.1371/journal.pcbi.1002571.s003) [file journal.pcbi.1002571.s003]

301 Moved Permanently

# Moved Permanently

The document has moved here.

---

Apache Server at www.ploscompbiol.org Port 80
